# Supplementary material
Source: Springer Nature journal article supplement (https://www.springermedizin.de/resource/supplementary/12885_2010_2533_MOESM2_ESM.pdf/9462292)

**a.**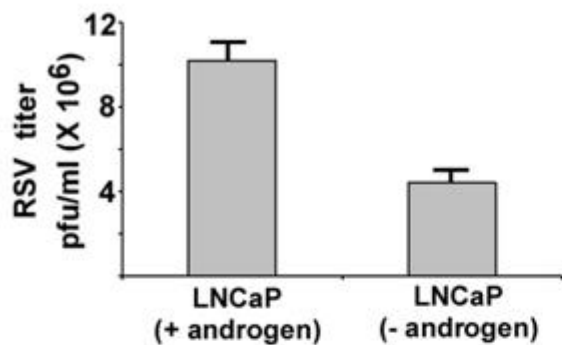**b.**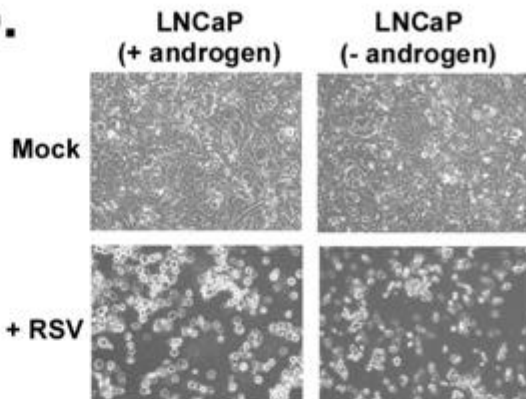**c.**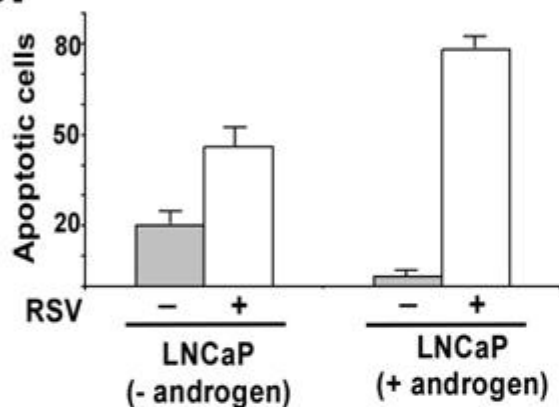**d.**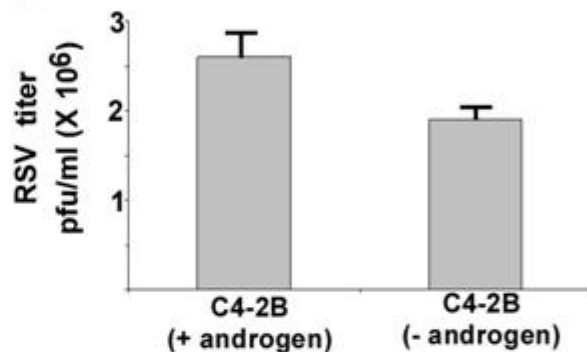**e.**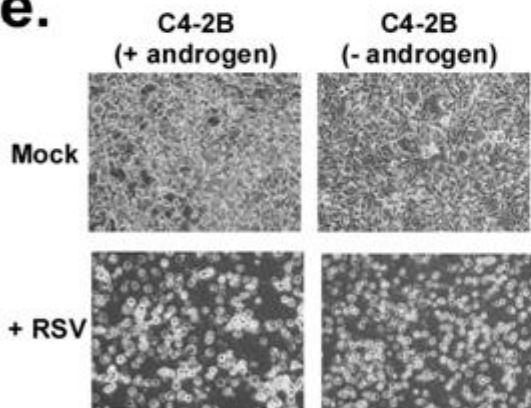

Supplement: MOESM2 [file 9462292]
